# Supplementary material for: Genetic Diversity and Genomic Plasticity of Cryptococcus neoformans AD Hybrid Strains
Source: PubMed Central journal article supplement (PMC3276195; doi:10.1534/g3.111.001255), 2012-01-01
Supplement: supp_2.1.83_001255SI.pdf [file supp_2.1.83_001255SI.pdf]

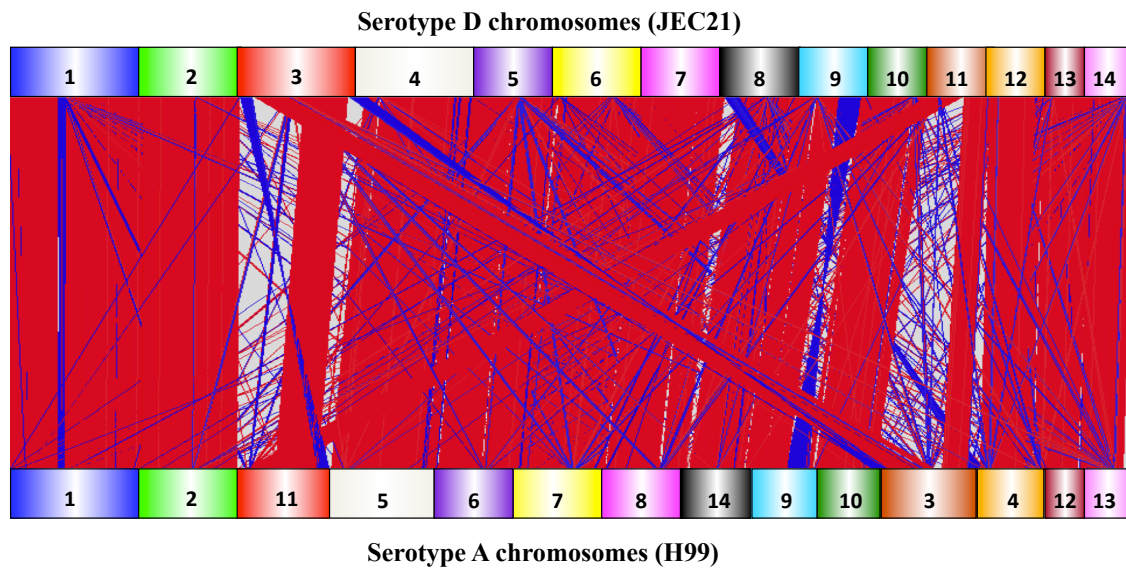

**Figure S1** Whole genome comparison between serotype A strain H99 and serotype D strain JEC21 using BLASTn and ATC tool. Red and blue blocks (lines) represent forward and reverse matches of the DNA sequence between strains JEC21 and H99, respectively.

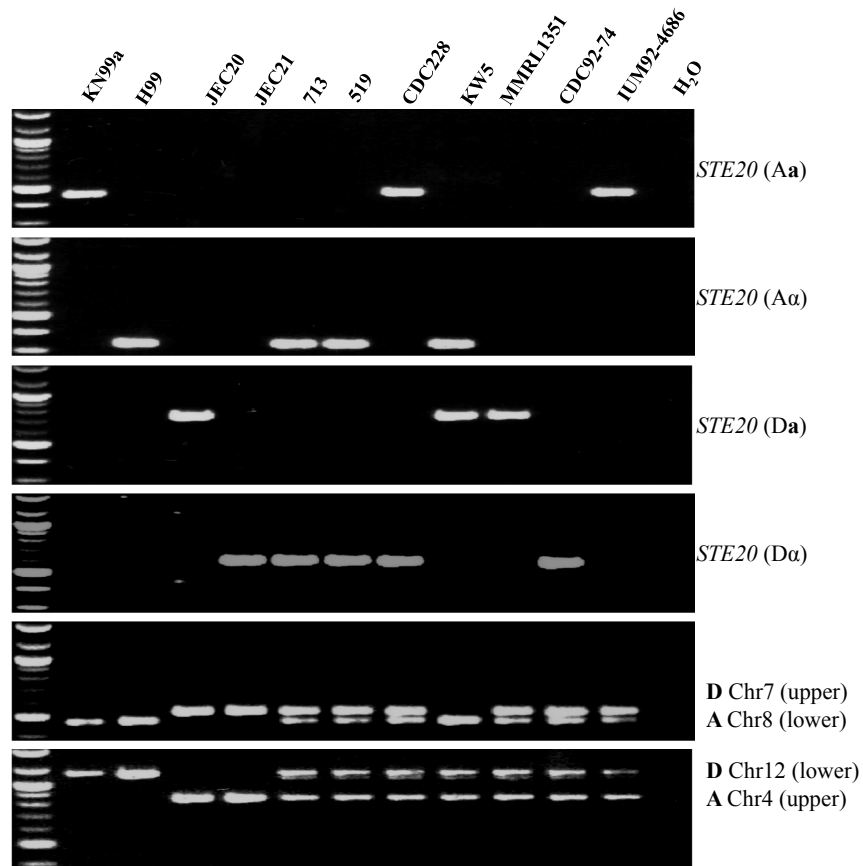

**Figure S2** Molecular determination of the serotype/mating type of the *C. neoformans* isolates based on PCR amplification of the *STE20* genes.



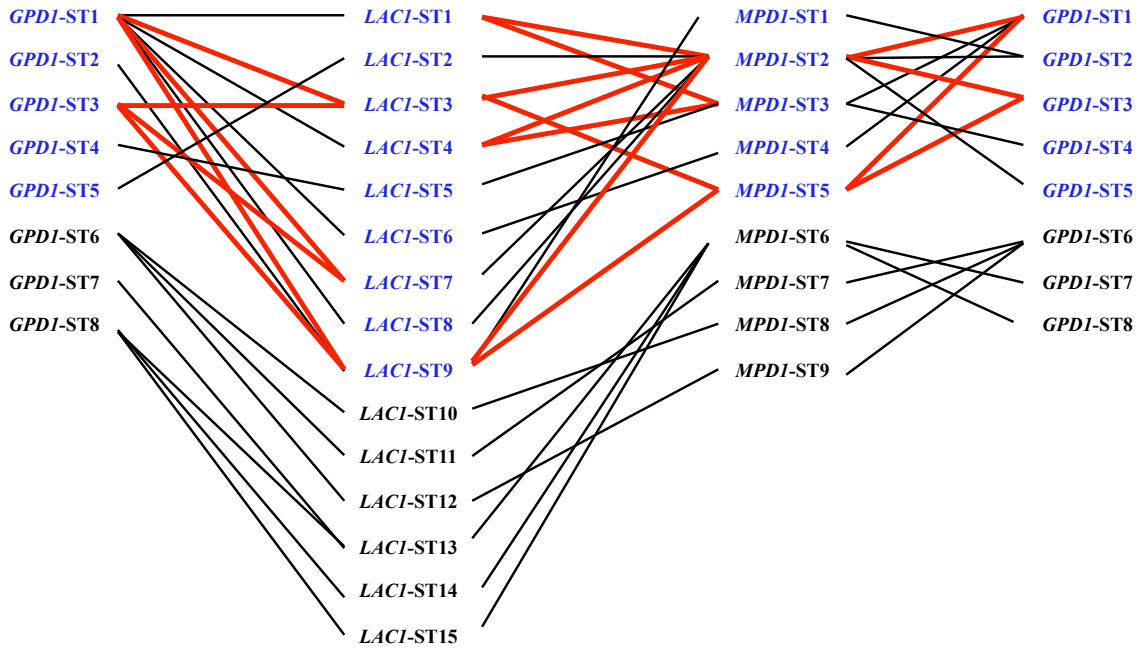

**Figure S4** Informative paired allele graphs of three MLST markers (*GPD1*, *LAC1*, and *MPD1*). An hourglass shape (shown in red) indicates the presence of all four possible pairs of alleles and serves as evidence for recombination. Serotype A MLST STs are shown in black and serotype D STs are in blue.

**Table S1** The sequence types (STs) of *C. neoformans* isolates analyzed in this study.

| Strain     | Serotype | Genome analyzed | <i>IGS</i> | <i>URE1</i> | <i>GPD1</i> | <i>LAC1</i> | <i>MPD1</i> | ST (5 markers) |
|------------|----------|-----------------|------------|-------------|-------------|-------------|-------------|----------------|
| AD6-93     | AD       | D               | 5          | 14          | 4           | 5           | 3           | 15             |
| AD7-97     | AD       | D               | 11         | 14          | 4           | 5           | 3           | 27             |
| AD6-38     | AD       | D               | 15         | 7           | 3           | 9           | 2           | 16             |
| AD7-91     | AD       | D               | 10         | 8           | 1           | 8           | 2           | 20             |
| AD7-85     | AD       | D               | 10         | 8           | 1           | 8           | 2           | 20             |
| AD7-69     | AD       | D               | 17         | 11          | 1           | 9           | 2           | 12             |
| AD7-75     | AD       | D               | 16         | 4           | 1           | 1           | 2           | 24             |
| AD2-71     | AD       | D               | 16         | 4           | 1           | 1           | 2           | 24             |
| AD7-95     | AD       | D               | 18         | 6           | 1           | 8           | 2           | 4              |
| 713        | AD       | D               | 15         | 17          | 5           | 2           | 2           | 1              |
| 42-10      | AD       | D               | 15         | 17          | 5           | 2           | 2           | 1              |
| 519        | AD       | D               | 15         | 17          | 5           | 2           | 2           | 1              |
| 620        | AD       | D               | 15         | 17          | 5           | 2           | 2           | 1              |
| ATCC48184  | AD       | D               | 6          | 7           | 3           | 9           | 2           | 7              |
| CDC228     | AD       | D               | 15         | 7           | 3           | 9           | 2           | 16             |
| CDC304     | AD       | D               | 15         | 7           | 3           | 9           | 2           | 16             |
| CDC92-74   | AD       | D               | 15         | 7           | 3           | 9           | 2           | 16             |
| CDC94-383  | AD       | D               | 10         | 8           | 1           | 8           | 2           | 20             |
| CBS132     | AD       | D               | 17         | 11          | 1           | 9           | 2           | 12             |
| IT752      | AD       | D               | 15         | 7           | 3           | 9           | 2           | 16             |
| IT756      | AD       | D               | 17         | 11          | 1           | 9           | 2           | 12             |
| IUM92-4686 | AD       | D               | 15         | 7           | 3           | 9           | 2           | 16             |
| IUM92-6198 | AD       | D               | 15         | 7           | 3           | 9           | 2           | 16             |
| MMRL752    | AD       | D               | 15         | 7           | 3           | 9           | 2           | 16             |
| MMRL774    | AD       | D               | 17         | 11          | 1           | 9           | 2           | 12             |
| MMRL1351   | AD       | D               | 10         | 8           | 1           | 8           | 2           | 20             |
| MMRL1365   | AD       | D               | 15         | 7           | 3           | 9           | 2           | 16             |
| NC34-21    | AD       | D               | 15         | 13          | 3           | 9           | 2           | 28             |
| ZG287      | AD       | D               | 12         | 1           | 3           | 3           | 5           | 6              |
| AD7-71     | D        | D               | 13         | 5           | 1           | 4           | 3           | 10             |
| AD2-62     | D        | D               | 16         | 4           | 1           | 1           | 3           | 21             |
| AD2-95     | D        | D               | 16         | 4           | 1           | 1           | 2           | 24             |
| AD2-96     | D        | D               | 16         | 4           | 1           | 1           | 2           | 24             |
| AD3-14     | D        | D               | 4          | 10          | 1           | 3           | 2           | 23             |
| AD3-13     | D        | D               | 4          | 10          | 1           | 3           | 2           | 23             |
| AD8-62     | D        | D               | 17         | 9           | 1           | 9           | 2           | 8              |
| 2-14       | D        | D               | 1          | 3           | 2           | 9           | 2           | 14             |
| 2-22       | D        | D               | 14         | 6           | 1           | 9           | 5           | 9              |
| 3-15       | D        | D               | 1          | 3           | 2           | 9           | 2           | 14             |

|           |    |   |    |    |   |    |   |    |
|-----------|----|---|----|----|---|----|---|----|
| 3-28      | D  | D | 1  | 3  | 2 | 9  | 2 | 14 |
| 431       | D  | D | 3  | 2  | 1 | 4  | 2 | 22 |
| 434       | D  | D | 2  | 15 | 1 | 9  | 2 | 17 |
| 528       | D  | D | 2  | 9  | 3 | 7  | 2 | 25 |
| 529       | D  | D | 2  | 9  | 3 | 7  | 2 | 25 |
| 709       | D  | D | 2  | 9  | 3 | 7  | 2 | 25 |
| 3311      | D  | D | 4  | 7  | 1 | 9  | 2 | 31 |
| B3179     | D  | D | 4  | 7  | 1 | 9  | 2 | 31 |
| CAP672    | D  | D | 9  | 12 | 1 | 1  | 2 | 5  |
| CDC92     | D  | D | 4  | 9  | 1 | 9  | 2 | 18 |
| CDC92     | D  | D | 3  | 16 | 1 | 7  | 2 | 11 |
| MMRL751   | D  | D | 2  | 7  | 3 | 7  | 2 | 30 |
| MMRL757   | D  | D | 8  | 7  | 3 | 7  | 2 | 29 |
| MMRL760   | D  | D | 2  | 9  | 3 | 7  | 2 | 25 |
| MMRL1076  | D  | D | 1  | 9  | 2 | 9  | 1 | 13 |
| NIH12     | D  | D | 17 | 9  | 1 | 9  | 2 | 8  |
| VANC.R461 | D  | D | 3  | 3  | 1 | 7  | 2 | 19 |
| Y290-90   | D  | D | 4  | 9  | 1 | 9  | 2 | 18 |
| JEC21     | D  | D | 9  | 9  | 1 | 9  | 2 | 26 |
| NIH264    | D  | D | 7  | 8  | 1 | 8  | 2 | 3  |
| NIH276    | D  | D | 7  | 8  | 1 | 8  | 2 | 3  |
| NIH430    | D  | D | 15 | 15 | 1 | 6  | 4 | 2  |
| NIH433    | D  | D | 9  | 12 | 1 | 1  | 2 | 5  |
| AD6-93    | AD | A | 22 | 18 | 6 | 11 | 7 | 35 |
| AD7-97    | AD | A | 22 | 18 | 6 | 11 | 7 | 35 |
| AD6-38    | AD | A | 21 | 19 | 6 | 10 | 8 | 38 |
| AD7-91    | AD | A | 20 | 20 | 8 | 13 | 6 | 34 |
| AD7-85    | AD | A | 20 | 20 | 8 | 13 | 6 | 34 |
| AD7-69    | AD | A | 22 | 20 | 7 | 13 | 6 | 37 |
| AD7-75    | AD | A | 22 | 20 | 8 | 15 | 6 | 39 |
| AD2-71    | AD | A | 22 | 20 | 8 | 15 | 6 | 39 |
| AD7-95    | AD | A | 19 | 20 | 8 | 13 | 6 | 36 |
| 713       | AD | A | 22 | 20 | 8 | 14 | 6 | 32 |
| 42-10     | AD | A | 22 | 20 | 8 | 14 | 6 | 32 |
| 5-19      | AD | A | 22 | 20 | 8 | 14 | 6 | 32 |
| 6-20      | AD | A | 22 | 20 | 8 | 14 | 6 | 32 |
| CDC228    | AD | A | 21 | 19 | 6 | 12 | 9 | 33 |
| CDC304    | AD | A | 21 | 19 | 6 | 12 | 9 | 33 |
| CDC92-74  | AD | A | 21 | 19 | 6 | 12 | 9 | 33 |
| IT752     | AD | A | 21 | 19 | 6 | 12 | 9 | 33 |
| KW5       | AD | A | 20 | 20 | 8 | 13 | 6 | 34 |
| MMRL752   | AD | A | 21 | 19 | 6 | 12 | 9 | 33 |

|         |    |   |    |    |   |    |   |    |
|---------|----|---|----|----|---|----|---|----|
| MMRL774 | AD | A | 22 | 20 | 7 | 13 | 6 | 37 |
| NC34-21 | AD | A | 21 | 19 | 6 | 12 | 9 | 33 |
| ZG287   | AD | A | 22 | 20 | 7 | 13 | 6 | 37 |
| ZG290   | AD | A | 21 | 19 | 6 | 12 | 9 | 33 |

---
