# Supplementary material for: Genetic Diversity and Genomic Plasticity of Cryptococcus neoformans AD Hybrid Strains
Source: PubMed Central journal article supplement (PMC3276195; doi:10.1534/g3.111.001255), 2012-01-01
Supplement: supp_2.1.83_FigureS1.pdf [file supp_2.1.83_FigureS1.pdf]

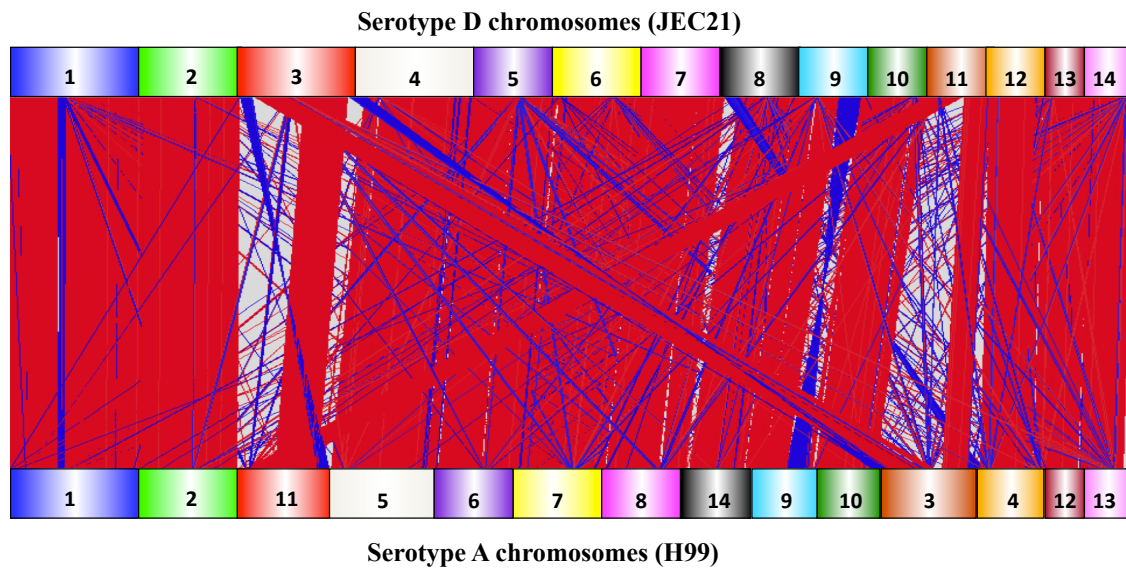

**Figure S1** Whole genome comparison between serotype A strain H99 and serotype D strain JEC21 using BLASTn and ATC tool. Red and blue blocks (lines) represent forward and reverse matches of the DNA sequence between strains JEC21 and H99, respectively.
