# Supplementary material for: Genetic Diversity and Genomic Plasticity of Cryptococcus neoformans AD Hybrid Strains
Source: PubMed Central journal article supplement (PMC3276195; doi:10.1534/g3.111.001255), 2012-01-01
Supplement: supp_2.1.83_FigureS2.pdf [file supp_2.1.83_FigureS2.pdf]

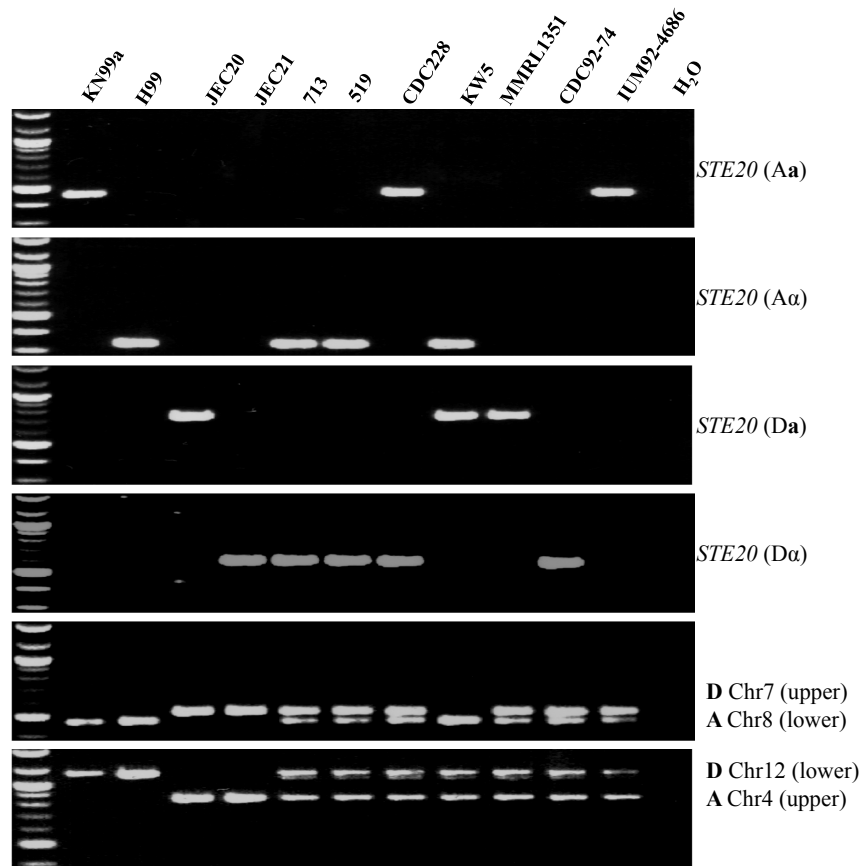

**Figure S2** Molecular determination of the serotype/mating type of the *C. neoformans* isolates based on PCR amplification of the *STE20* genes.
