# Supplementary material for: Genetic Diversity and Genomic Plasticity of Cryptococcus neoformans AD Hybrid Strains
Source: PubMed Central journal article supplement (PMC3276195; doi:10.1534/g3.111.001255), 2012-01-01
Supplement: supp_2.1.83_FigureS4.pdf [file supp_2.1.83_FigureS4.pdf]

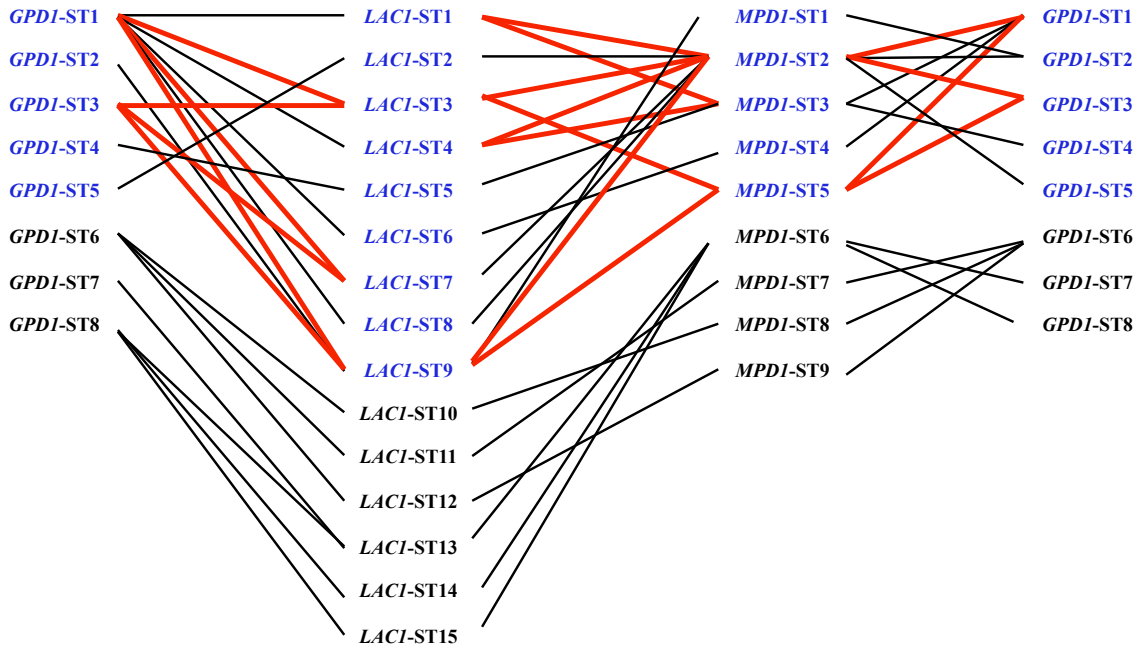

**Figure S4** Informative paired allele graphs of three MLST markers (*GPD1*, *LAC1*, and *MPD1*). An hourglass shape (shown in red) indicates the presence of all four possible pairs of alleles and serves as evidence for recombination. Serotype A MLST STs are shown in black and serotype D STs are in blue.
